# Supplementary material
Source: ML conference proceedings conference paper supplement (https://www.ecva.net/papers/eccv_2020/papers_ECCV/html/123640664_ECCV_2020_paper.php)
Supplement: Supplementary file 4 [file 123640664-supp.zip]

Archive with 24 entries (23 files):
- 3318-supp/
- 3318-supp/.DS_Store
- 3318-supp/.pdf
- 3318-supp/3318-supp.aux
- 3318-supp/3318-supp.bbl
- 3318-supp/3318-supp.blg
- 3318-supp/3318-supp.log
- 3318-supp/3318-supp.pdf
- 3318-supp/3318-supp.synctex.gz
- 3318-supp/3318-supp.tex
- 3318-supp/3318-supp.tex.bak
- 3318-supp/comment.sty
- 3318-supp/cvpr_eso.sty
- 3318-supp/eso-pic.sty
- 3318-supp/history.txt
- 3318-supp/llncs.cls
- 3318-supp/llncsdoc.pdf
- 3318-supp/math_commands.tex
- 3318-supp/miniimagenet_data.pdf
- 3318-supp/omniglot_data.pdf
- 3318-supp/README.txt
- 3318-supp/ruler.sty
- 3318-supp/splncs.bst
- 3318-supp/splncs04.bst
