# Supplementary material
Source: ML conference proceedings conference paper supplement (https://www.ecva.net/papers/eccv_2020/papers_ECCV/html/123640664_ECCV_2020_paper.php)
Supplement: Supplementary file 4 [file 123640664-supp.zip › 3318-supp/3318-supp.aux]

\relax 
\@writefile{toc}{\contentsline {title}{Meta-Learning with Network Pruning \unskip \ \ignorespaces (Supplementary Materials)}{1}}
\@writefile{toc}{\authcount {4}}
\@writefile{toc}{\contentsline {author}{Hongduan Tian \and Bo Liu \and Xiao-Tong Yuan \and Qingshan Liu}{1}}
\@writefile{toc}{\contentsline {section}{\numberline {A}Proofs of Results}{1}}
\@writefile{toc}{\contentsline {subsection}{\numberline {A.1}Proof of Theorem\nobreakspace  {}1\hbox {}}{1}}
\newlabel{append:proof_thrm_1}{{A.1}{1}}
\newlabel{lemma:universe_support}{{1}{1}}
\citation{rigollet201518}
\citation{nichol2018first}
\citation{nichol2018first}
\citation{santoro2016meta}
\@writefile{toc}{\contentsline {subsection}{\numberline {A.2}Proof of Corollary\nobreakspace  {}1\hbox {}}{3}}
\@writefile{toc}{\contentsline {section}{\numberline {B}Detailed Experimental Settings}{3}}
\newlabel{Appdx:Detailed_Settings}{{B}{3}}
\@writefile{toc}{\contentsline {subsection}{\numberline {B.1}Model}{3}}
\newlabel{appdx:model}{{B.1}{3}}
\@writefile{toc}{\contentsline {subsection}{\numberline {B.2}Datasets}{3}}
\newlabel{subsec:dataset}{{B.2}{3}}
\citation{krizhevsky2012imagenet}
\citation{russakovsky2015imagenet}
\citation{vinyals2016matching}
\newlabel{omniglot_tasks}{{1(a)}{4}}
\newlabel{sub@omniglot_tasks}{{(a)}{4}}
\newlabel{imagenet_tasks}{{1(b)}{4}}
\newlabel{sub@imagenet_tasks}{{(b)}{4}}
\@writefile{lof}{\contentsline {figure}{\numberline {1}{\ignorespaces Tasks used in our experiments. (a). Tasks generated from Omniglot. (b). Tasks generated from MiniImageNet or TieredImageNet dataset.}}{4}}
\@writefile{lof}{\contentsline {subfigure}{\numberline{(a)}{\ignorespaces {5-way 1-shot tasks generated from Omniglot}}}{4}}
\@writefile{lof}{\contentsline {subfigure}{\numberline{(b)}{\ignorespaces {5-way 1-shot tasks generated from MiniImageNet or TieredImageNet dataset}}}{4}}
\newlabel{Fig:DSD_hyper}{{1}{4}}
\@writefile{toc}{\contentsline {subsection}{\numberline {B.3}Detailed Experimental Settings}{4}}
\newlabel{subsec:Hyper_settings}{{B.3}{4}}
\@writefile{lot}{\contentsline {table}{\numberline {1}{\ignorespaces Detailed experimental settings for Omniglot, MiniImageNet, TieredImageNet datasets with DSD-based Reptile.}}{5}}
\newlabel{DSD_Detailed_experimental_settings}{{1}{5}}
\@writefile{toc}{\contentsline {section}{\numberline {C}Additional Experimental Results}{5}}
\newlabel{apdx_c}{{C}{5}}
\@writefile{toc}{\contentsline {subsection}{\numberline {C.1}Results on Omniglot dataset}{5}}
\newlabel{Appdx:Omniglot_complete_results}{{C.1}{5}}
\citation{zintgraf2019fast}
\@writefile{lot}{\contentsline {table}{\numberline {2}{\ignorespaces Detailed experimental settings for Omniglot, MiniImageNet, TieredImageNet datasets with IHT-based Reptile.}}{6}}
\newlabel{IHT_Detailed_experimental_settings}{{2}{6}}
\@writefile{toc}{\contentsline {subsection}{\numberline {C.2}Results on MiniImageNet dataset}{6}}
\newlabel{Appdx:MiniImageNet_complete_results}{{C.2}{6}}
\@writefile{toc}{\contentsline {subsection}{\numberline {C.3}Results on TieredImageNet dataset}{7}}
\newlabel{Appdx:TieredImageNet_complete_results}{{C.3}{7}}
\@writefile{lot}{\contentsline {table}{\numberline {3}{\ignorespaces Few Shot Classification results on Omniglot dataset for 4-layer convolutional network with different channels on 5-way 1-shot and 5-way 5-shot tasks. The ``$\pm $'' shows $95\%$ confidence intervals over tasks. The evaluation baselines are run by us.}}{8}}
\newlabel{Omniglot5wayresults_table}{{3}{8}}
\@writefile{lot}{\contentsline {table}{\numberline {4}{\ignorespaces Few Shot Classification results on MiniImageNet dataset for 4-layer convolutional network with different channels on 5 way setting. The ``$\pm $'' shows $95\%$ confidence intervals over tasks. The evaluation baselines are run by us.}}{9}}
\newlabel{MiniImageNet5wayresults_table}{{4}{9}}
\@writefile{lot}{\contentsline {table}{\numberline {5}{\ignorespaces Few Shot Classification results on TieredImageNet dataset for 4-layer convolutional network with different channels on 5 way setting. The ``$\pm $'' shows $95\%$ confidence intervals over tasks. The evaluation baselines are run by us.}}{10}}
\newlabel{TieredImageNet5wayresults_table}{{5}{10}}
\bibstyle{splncs04}
\bibdata{mybib}
\bibcite{krizhevsky2012imagenet}{1}
\bibcite{nichol2018first}{2}
\bibcite{rigollet201518}{3}
\bibcite{russakovsky2015imagenet}{4}
\bibcite{santoro2016meta}{5}
\bibcite{vinyals2016matching}{6}
\bibcite{zintgraf2019fast}{7}
