# Supplementary material
Source: ML conference proceedings conference paper supplement (https://www.ecva.net/papers/eccv_2020/papers_ECCV/html/123640664_ECCV_2020_paper.php)
Supplement: Supplementary file 4 [file 123640664-supp.zip › 3318-supp/3318-supp.blg]

This is BibTeX, Version 0.99dThe top-level auxiliary file: 3318-supp.aux
The style file: splncs04.bst
Database file #1: mybib.bib
