# Supplementary material
Source: ML conference proceedings conference paper supplement (https://www.ecva.net/papers/eccv_2020/papers_ECCV/html/123640664_ECCV_2020_paper.php)
Supplement: Supplementary file 4 [file 123640664-supp.zip › 3318-supp/3318-supp.log]

This is pdfTeX, Version 3.1415926-2.3-1.40.12 (MiKTeX 2.9) (preloaded format=pdflatex 2020.1.16)  16 JUL 2020 08:37
entering extended mode
**D:/论文终稿/Final-version/3318-supp/3318-supp.tex
(D:/论文终稿/Final-version/3318-supp/3318-supp.tex
LaTeX2e <2011/06/27>
Babel <v3.8m> and hyphenation patterns for loaded.
(D:\论文终稿\Final-version\3318-supp\llncs.cls
Document Class: llncs 2018/03/10 v2.20 
 LaTeX document class for Lecture Notes in Computer Science
(G:\software\ctex\MiKTeX\tex\latex\base\article.cls
Document Class: article 2007/10/19 v1.4h Standard LaTeX document class
(G:\software\ctex\MiKTeX\tex\latex\base\size10.clo
File: size10.clo 2007/10/19 v1.4h Standard LaTeX file (size option)
)
\c@part=\count79
\c@section=\count80
\c@subsection=\count81
\c@subsubsection=\count82
\c@paragraph=\count83
\c@subparagraph=\count84
\c@figure=\count85
\c@table=\count86
\abovecaptionskip=\skip41
\belowcaptionskip=\skip42
\bibindent=\dimen102
)
(G:\software\ctex\MiKTeX\tex\latex\tools\multicol.sty
Package: multicol 2011/06/27 v1.7a multicolumn formatting (FMi)
\c@tracingmulticols=\count87
\mult@box=\box26
\multicol@leftmargin=\dimen103
\c@unbalance=\count88
\c@collectmore=\count89
\doublecol@number=\count90
\multicoltolerance=\count91
\multicolpretolerance=\count92
\full@width=\dimen104
\page@free=\dimen105
\premulticols=\dimen106
\postmulticols=\dimen107
\multicolsep=\skip43
\multicolbaselineskip=\skip44
\partial@page=\box27
\last@line=\box28
\mult@rightbox=\box29
\mult@grightbox=\box30
\mult@gfirstbox=\box31
\mult@firstbox=\box32
\@tempa=\box33
\@tempa=\box34
\@tempa=\box35
\@tempa=\box36
\@tempa=\box37
\@tempa=\box38
\@tempa=\box39
\@tempa=\box40
\@tempa=\box41
\@tempa=\box42
\@tempa=\box43
\@tempa=\box44
\@tempa=\box45
\@tempa=\box46
\@tempa=\box47
\@tempa=\box48
\@tempa=\box49
\c@columnbadness=\count93
\c@finalcolumnbadness=\count94
\last@try=\dimen108
\multicolovershoot=\dimen109
\multicolundershoot=\dimen110
\mult@nat@firstbox=\box50
\colbreak@box=\box51
\multicol@sort@counter=\count95
)
(G:\software\ctex\MiKTeX\tex\latex\oberdiek\aliascnt.sty
Package: aliascnt 2009/09/08 v1.3 Alias counter (HO)

(G:\software\ctex\MiKTeX\tex\latex\carlisle\remreset.sty))
\c@chapter=\count96
LaTeX Font Info:    Redeclaring math symbol \Gamma on input line 362.
LaTeX Font Info:    Redeclaring math symbol \Delta on input line 363.
LaTeX Font Info:    Redeclaring math symbol \Theta on input line 364.
LaTeX Font Info:    Redeclaring math symbol \Lambda on input line 365.
LaTeX Font Info:    Redeclaring math symbol \Xi on input line 366.
LaTeX Font Info:    Redeclaring math symbol \Pi on input line 367.
LaTeX Font Info:    Redeclaring math symbol \Sigma on input line 368.
LaTeX Font Info:    Redeclaring math symbol \Upsilon on input line 369.
LaTeX Font Info:    Redeclaring math symbol \Phi on input line 370.
LaTeX Font Info:    Redeclaring math symbol \Psi on input line 371.
LaTeX Font Info:    Redeclaring math symbol \Omega on input line 372.
\tocchpnum=\dimen111
\tocsecnum=\dimen112
\tocsectotal=\dimen113
\tocsubsecnum=\dimen114
\tocsubsectotal=\dimen115
\tocsubsubsecnum=\dimen116
\tocsubsubsectotal=\dimen117
\tocparanum=\dimen118
\tocparatotal=\dimen119
\tocsubparanum=\dimen120
\@tempcntc=\count97
\fnindent=\dimen121
\c@@inst=\count98
\c@@auth=\count99
\c@auco=\count100
\instindent=\dimen122
\authrun=\box52
\authorrunning=\toks14
\tocauthor=\toks15
\titrun=\box53
\titlerunning=\toks16
\toctitle=\toks17
\c@theorem=\count101
\c@case=\count102
\c@conjecture=\count103
\c@corollary=\count104
\c@definition=\count105
\c@example=\count106
\c@exercise=\count107
\c@lemma=\count108
\c@note=\count109
\c@problem=\count110
\c@property=\count111
\c@proposition=\count112
\c@question=\count113
\c@solution=\count114
\c@remark=\count115
\headlineindent=\dimen123
)
(G:\software\ctex\MiKTeX\tex\latex\graphics\graphicx.sty
Package: graphicx 1999/02/16 v1.0f Enhanced LaTeX Graphics (DPC,SPQR)

(G:\software\ctex\MiKTeX\tex\latex\graphics\keyval.sty
Package: keyval 1999/03/16 v1.13 key=value parser (DPC)
\KV@toks@=\toks18
)
(G:\software\ctex\MiKTeX\tex\latex\graphics\graphics.sty
Package: graphics 2009/02/05 v1.0o Standard LaTeX Graphics (DPC,SPQR)

(G:\software\ctex\MiKTeX\tex\latex\graphics\trig.sty
Package: trig 1999/03/16 v1.09 sin cos tan (DPC)
)
(G:\software\ctex\MiKTeX\tex\latex\00miktex\graphics.cfg
File: graphics.cfg 2007/01/18 v1.5 graphics configuration of teTeX/TeXLive
)
Package graphics Info: Driver file: pdftex.def on input line 91.

(G:\software\ctex\MiKTeX\tex\latex\pdftex-def\pdftex.def
File: pdftex.def 2011/05/27 v0.06d Graphics/color for pdfTeX

(G:\software\ctex\MiKTeX\tex\generic\oberdiek\infwarerr.sty
Package: infwarerr 2010/04/08 v1.3 Providing info/warning/message (HO)
)
(G:\software\ctex\MiKTeX\tex\generic\oberdiek\ltxcmds.sty
Package: ltxcmds 2011/04/18 v1.20 LaTeX kernel commands for general use (HO)
)
\Gread@gobject=\count116
))
\Gin@req@height=\dimen124
\Gin@req@width=\dimen125
)
(G:\software\ctex\MiKTeX\tex\latex\oberdiek\epstopdf.sty
Package: epstopdf 2010/02/09 v2.5 Conversion with epstopdf on the fly (HO)

(G:\software\ctex\MiKTeX\tex\latex\oberdiek\epstopdf-base.sty
Package: epstopdf-base 2010/02/09 v2.5 Base part for package epstopdf

(G:\software\ctex\MiKTeX\tex\latex\oberdiek\grfext.sty
Package: grfext 2010/08/19 v1.1 Managing graphics extensions (HO)

(G:\software\ctex\MiKTeX\tex\generic\oberdiek\kvdefinekeys.sty
Package: kvdefinekeys 2011/04/07 v1.3 Defining keys (HO)
))
(G:\software\ctex\MiKTeX\tex\latex\oberdiek\kvoptions.sty
Package: kvoptions 2010/12/23 v3.10 Keyval support for LaTeX options (HO)

(G:\software\ctex\MiKTeX\tex\generic\oberdiek\kvsetkeys.sty
Package: kvsetkeys 2011/04/07 v1.13 Key value parser (HO)

(G:\software\ctex\MiKTeX\tex\generic\oberdiek\etexcmds.sty
Package: etexcmds 2011/02/16 v1.5 Prefix for e-TeX command names (HO)

(G:\software\ctex\MiKTeX\tex\generic\oberdiek\ifluatex.sty
Package: ifluatex 2010/03/01 v1.3 Provides the ifluatex switch (HO)
Package ifluatex Info: LuaTeX not detected.
)
Package etexcmds Info: Could not find \expanded.
(etexcmds)             That can mean that you are not using pdfTeX 1.50 or
(etexcmds)             that some package has redefined \expanded.
(etexcmds)             In the latter case, load this package earlier.
)))
(G:\software\ctex\MiKTeX\tex\generic\oberdiek\pdftexcmds.sty
Package: pdftexcmds 2011/04/22 v0.16 Utilities of pdfTeX for LuaTeX (HO)

(G:\software\ctex\MiKTeX\tex\generic\oberdiek\ifpdf.sty
Package: ifpdf 2011/01/30 v2.3 Provides the ifpdf switch (HO)
Package ifpdf Info: pdfTeX in PDF mode is detected.
)
Package pdftexcmds Info: LuaTeX not detected.
Package pdftexcmds Info: \pdf@primitive is available.
Package pdftexcmds Info: \pdf@ifprimitive is available.
Package pdftexcmds Info: \pdfdraftmode found.
)
Package grfext Info: Graphics extension search list:
(grfext)             [.png,.pdf,.jpg,.mps,.jpeg,.jbig2,.jb2,.PNG,.PDF,.JPG,.JPE
G,.JBIG2,.JB2,.eps]
(grfext)             \AppendGraphicsExtensions on input line 452.
))
(D:\论文终稿\Final-version\3318-supp\comment.sty
\CommentStream=\write3

Excluding comment 'comment')
(G:\software\ctex\MiKTeX\tex\latex\ams\math\amsmath.sty
Package: amsmath 2000/07/18 v2.13 AMS math features
\@mathmargin=\skip45

For additional information on amsmath, use the `?' option.
(G:\software\ctex\MiKTeX\tex\latex\ams\math\amstext.sty
Package: amstext 2000/06/29 v2.01

(G:\software\ctex\MiKTeX\tex\latex\ams\math\amsgen.sty
File: amsgen.sty 1999/11/30 v2.0
\@emptytoks=\toks19
\ex@=\dimen126
))
(G:\software\ctex\MiKTeX\tex\latex\ams\math\amsbsy.sty
Package: amsbsy 1999/11/29 v1.2d
\pmbraise@=\dimen127
)
(G:\software\ctex\MiKTeX\tex\latex\ams\math\amsopn.sty
Package: amsopn 1999/12/14 v2.01 operator names
)
\inf@bad=\count117
LaTeX Info: Redefining \frac on input line 211.
\uproot@=\count118
\leftroot@=\count119
LaTeX Info: Redefining \overline on input line 307.
\classnum@=\count120
\DOTSCASE@=\count121
LaTeX Info: Redefining \ldots on input line 379.
LaTeX Info: Redefining \dots on input line 382.
LaTeX Info: Redefining \cdots on input line 467.
\Mathstrutbox@=\box54
\strutbox@=\box55
\big@size=\dimen128
LaTeX Font Info:    Redeclaring font encoding OML on input line 567.
LaTeX Font Info:    Redeclaring font encoding OMS on input line 568.


Package amsmath Warning: Unable to redefine math accent \vec.

\macc@depth=\count122
\c@MaxMatrixCols=\count123
\dotsspace@=\muskip10
\c@parentequation=\count124
\dspbrk@lvl=\count125
\tag@help=\toks20
\row@=\count126
\column@=\count127
\maxfields@=\count128
\andhelp@=\toks21
\eqnshift@=\dimen129
\alignsep@=\dimen130
\tagshift@=\dimen131
\tagwidth@=\dimen132
\totwidth@=\dimen133
\lineht@=\dimen134
\@envbody=\toks22
\multlinegap=\skip46
\multlinetaggap=\skip47
\mathdisplay@stack=\toks23
LaTeX Info: Redefining \[ on input line 2666.
LaTeX Info: Redefining \] on input line 2667.
) (G:\software\ctex\MiKTeX\tex\latex\amsfonts\amssymb.sty
Package: amssymb 2009/06/22 v3.00

(G:\software\ctex\MiKTeX\tex\latex\amsfonts\amsfonts.sty
Package: amsfonts 2009/06/22 v3.00 Basic AMSFonts support
\symAMSa=\mathgroup4
\symAMSb=\mathgroup5
LaTeX Font Info:    Overwriting math alphabet `\mathfrak' in version `bold'
(Font)                  U/euf/m/n --> U/euf/b/n on input line 96.
))
(G:\software\ctex\MiKTeX\tex\latex\graphics\color.sty
Package: color 2005/11/14 v1.0j Standard LaTeX Color (DPC)

(G:\software\ctex\MiKTeX\tex\latex\00miktex\color.cfg
File: color.cfg 2007/01/18 v1.5 color configuration of teTeX/TeXLive
)
Package color Info: Driver file: pdftex.def on input line 130.
)
(G:\software\ctex\MiKTeX\tex\latex\algorithm2e\algorithm2e.sty
Package: algorithm2e 2008/00/00 v3.10 algorithms environments
\c@AlgoLine=\count129

(G:\software\ctex\MiKTeX\tex\latex\base\ifthen.sty
Package: ifthen 2001/05/26 v1.1c Standard LaTeX ifthen package (DPC)
)
(G:\software\ctex\MiKTeX\tex\latex\tools\xspace.sty
Package: xspace 2009/10/20 v1.13 Space after command names (DPC,MH)
)
(G:\software\ctex\MiKTeX\tex\latex\ltxmisc\relsize.sty
Package: relsize 2003/07/04 ver 3.1
)
********************************************************
Package `algorithm2e' Release 4.01 -- december 14 2009 --
- algorithm2e-announce@lirmm.fr mailing list for announcement about releases
- algorithm2e-discussion@lirmm.fr mailing list for discussion about package
subscribe by emailing sympa@lirmm.fr with 'subscribe <list> <firstname name>'
- Author: Christophe Fiorio (fiorio@lirmm.fr)
********************************************************
\skiptotal=\skip48
\skiplinenumber=\skip49
\skiprule=\skip50
\skiphlne=\skip51
\skiptext=\skip52
\skiplength=\skip53
\algomargin=\skip54
\skipalgocfslide=\skip55
\algowidth=\dimen135
\inoutsize=\dimen136
\inoutline=\dimen137
\interspacetitleruled=\dimen138
\interspacealgoruled=\dimen139
\interspacetitleboxruled=\dimen140
\algocf@inoutbox=\box56
\algocf@inputbox=\box57
\AlCapSkip=\skip56
\AlCapHSkip=\skip57
\algocf@nlbox=\box58
\algocf@hangingbox=\box59
\algocf@capbox=\box60
\algoheightruledefault=\skip58
\algoheightrule=\skip59
\algotitleheightruledefault=\skip60
\algotitleheightrule=\skip61
\c@algocfline=\count130
\c@algocfproc=\count131
\c@algocf=\count132
\algocf@algoframe=\box61
\algocf@algobox=\box62
) (G:\software\ctex\MiKTeX\tex\latex\subfigure\subfigure.sty
Package: subfigure 2002/07/30 v2.1.4 subfigure package
\subfigtopskip=\skip62
\subfigcapskip=\skip63
\subfigcaptopadj=\dimen141
\subfigbottomskip=\skip64
\subfigcapmargin=\dimen142
\subfiglabelskip=\skip65
\c@subfigure=\count133
\c@lofdepth=\count134
\c@subtable=\count135
\c@lotdepth=\count136

****************************************
* Local config file subfigure.cfg used *
****************************************
(G:\software\ctex\MiKTeX\tex\latex\subfigure\subfigure.cfg)
\subfig@top=\skip66
\subfig@bottom=\skip67
)
(G:\software\ctex\MiKTeX\tex\latex\wrapfig\wrapfig.sty
\wrapoverhang=\dimen143
\WF@size=\dimen144
\c@WF@wrappedlines=\count137
\WF@box=\box63
\WF@everypar=\toks24
Package: wrapfig 2003/01/31  v 3.6
)
(G:\software\ctex\MiKTeX\tex\latex\enumitem\enumitem.sty
Package: enumitem 2011/09/28 v3.5.2 Customized lists
\labelindent=\skip68
\enit@outerparindent=\dimen145
\enit@toks=\toks25
\enit@inbox=\box64
\enitdp@description=\count138
)
(G:\software\ctex\MiKTeX\tex\latex\multirow\multirow.sty
\bigstrutjot=\dimen146
)
(G:\software\ctex\MiKTeX\tex\latex\tools\xr.sty
Package: xr 1994/05/28 v5.02 eXternal References (DPC)
)
(D:\论文终稿\Final-version\3318-supp\math_commands.tex
(G:\software\ctex\MiKTeX\tex\latex\tools\bm.sty
Package: bm 2004/02/26 v1.1c Bold Symbol Support (DPC/FMi)
\symboldoperators=\mathgroup6
\symboldletters=\mathgroup7
\symboldsymbols=\mathgroup8
LaTeX Font Info:    Redeclaring math alphabet \mathbf on input line 138.
LaTeX Info: Redefining \bm on input line 204.
)
LaTeX Font Info:    Overwriting math alphabet `\mathsfit' in version `bold'
(Font)                  OT1/cmss/m/sl --> OT1/cmss/bx/n on input line 314.
)
Package xr Info: IMPORTING LABELS FROM ../3318/3318.aux on input line 20.

(D:\论文终稿\Final-version\3318-supp\3318-supp.aux

LaTeX Warning: Label `Fig:DSD_hyper' multiply defined.

)
LaTeX Font Info:    Checking defaults for OML/cmm/m/it on input line 27.
LaTeX Font Info:    ... okay on input line 27.
LaTeX Font Info:    Checking defaults for T1/cmr/m/n on input line 27.
LaTeX Font Info:    ... okay on input line 27.
LaTeX Font Info:    Checking defaults for OT1/cmr/m/n on input line 27.
LaTeX Font Info:    ... okay on input line 27.
LaTeX Font Info:    Checking defaults for OMS/cmsy/m/n on input line 27.
LaTeX Font Info:    ... okay on input line 27.
LaTeX Font Info:    Checking defaults for OMX/cmex/m/n on input line 27.
LaTeX Font Info:    ... okay on input line 27.
LaTeX Font Info:    Checking defaults for U/cmr/m/n on input line 27.
LaTeX Font Info:    ... okay on input line 27.
 (G:\software\ctex\MiKTeX\tex\context\base\supp-pdf.mkii
[Loading MPS to PDF converter (version 2006.09.02).]
\scratchcounter=\count139
\scratchdimen=\dimen147
\scratchbox=\box65
\nofMPsegments=\count140
\nofMParguments=\count141
\everyMPshowfont=\toks26
\MPscratchCnt=\count142
\MPscratchDim=\dimen148
\MPnumerator=\count143
\makeMPintoPDFobject=\count144
\everyMPtoPDFconversion=\toks27
) Excluding 'comment' comment.
LaTeX Font Info:    Try loading font information for U+msa on input line 68.

(G:\software\ctex\MiKTeX\tex\latex\amsfonts\umsa.fd
File: umsa.fd 2009/06/22 v3.00 AMS symbols A
)
LaTeX Font Info:    Try loading font information for U+msb on input line 68.

(G:\software\ctex\MiKTeX\tex\latex\amsfonts\umsb.fd
File: umsb.fd 2009/06/22 v3.00 AMS symbols B
)
LaTeX Font Info:    Try loading font information for OMS+cmtt on input line 68.

LaTeX Font Info:    No file OMScmtt.fd. on input line 68.


LaTeX Font Warning: Font shape `OMS/cmtt/m/n' undefined
(Font)              using `OMS/cmsy/m/n' instead
(Font)              for symbol `textbraceleft' on input line 68.

[1


{G:/software/ctex/UserData/pdftex/config/pdftex.map{Unicode.sfd}{UGBK.sfd}}]
Overfull \hbox (5.08179pt too wide) in paragraph at lines 116--118
\OT1/cmr/m/n/10 Therefore, there ex-ist-s a set of points $\OML/cmm/m/it/10 
 \OMS/cmsy/m/n/10  \U/msb/m/n/10 R[]$ \OT1/cmr/m/n/10 with car-di-nal-i-ty at 
most $\OMS/cmsy/m/n/10 N\OT1/cmr/m/n/10 (\OML/cmm/m/it/10 ; []; L[]\OT1/cmr/m/
n/10 )$
 []

Missing character: There is no � in font cmr10!
Missing character: There is no � in font cmr10!
[2] <omniglot_data.pdf, id=25, 963.6pt x 542.025pt>
File: omniglot_data.pdf Graphic file (type pdf)
 <use omniglot_data.pdf>
Package pdftex.def Info: omniglot_data.pdf used on input line 188.
(pdftex.def)             Requested size: 170.23152pt x 95.74901pt.

Overfull \hbox (3.61371pt too wide) in paragraph at lines 188--188
[][] 
 []

<miniimagenet_data.pdf, id=26, 963.6pt x 542.025pt>
File: miniimagenet_data.pdf Graphic file (type pdf)

<use miniimagenet_data.pdf>
Package pdftex.def Info: miniimagenet_data.pdf used on input line 193.
(pdftex.def)             Requested size: 170.23152pt x 95.74901pt.

Overfull \hbox (3.61371pt too wide) in paragraph at lines 193--193
[][] 
 []


Underfull \hbox (badness 1117) in paragraph at lines 193--193
[]\OT1/cmr/m/n/9 (b) 5-way 1-shot tasks gen-er-at-ed from
 []


LaTeX Warning: `h' float specifier changed to `ht'.

[3]
Overfull \hbox (0.48058pt too wide) in paragraph at lines 233--234
[]\OT1/cmr/bx/n/10 TieredImageNet \OT1/cmr/m/n/10 The Tiered-Im-a-geNet dataset
 con-sist-s of 608 class-es from
 []

[4 <D:/论文终稿/Final-version/3318-supp/omniglot_data.pdf> <D:/论文终稿
/Final-version/3318-supp/miniimagenet_data.pdf>]

LaTeX Warning: `h' float specifier changed to `ht'.


LaTeX Warning: `h' float specifier changed to `ht'.

[5]

LaTeX Warning: `h' float specifier changed to `ht'.

[6]

LaTeX Warning: `h' float specifier changed to `ht'.

[7] [8] [9] [10] (D:\论文终稿\Final-version\3318-supp\3318-supp.bbl)
[11

] (D:\论文终稿\Final-version\3318-supp\3318-supp.aux)

LaTeX Font Warning: Some font shapes were not available, defaults substituted.


LaTeX Warning: There were multiply-defined labels.

 ) 
Here is how much of TeX's memory you used:
 5119 strings out of 495354
 64031 string characters out of 3183355
 187046 words of memory out of 3000000
 8175 multiletter control sequences out of 15000+200000
 14767 words of font info for 55 fonts, out of 3000000 for 9000
 14 hyphenation exceptions out of 8191
 42i,11n,24p,1904b,377s stack positions out of 5000i,500n,10000p,200000b,50000s
<G:/software/ctex/MiKTeX/fonts/type1/public/amsfonts/cm/cmbx10.pfb><G:/softwa
re/ctex/MiKTeX/fonts/type1/public/amsfonts/cm/cmbx12.pfb><G:/software/ctex/MiKT
eX/fonts/type1/public/amsfonts/cm/cmbx9.pfb><G:/software/ctex/MiKTeX/fonts/type
1/public/amsfonts/cm/cmex10.pfb><G:/software/ctex/MiKTeX/fonts/type1/public/ams
fonts/cm/cmmi10.pfb><G:/software/ctex/MiKTeX/fonts/type1/public/amsfonts/cm/cmm
i5.pfb><G:/software/ctex/MiKTeX/fonts/type1/public/amsfonts/cm/cmmi7.pfb><G:/so
ftware/ctex/MiKTeX/fonts/type1/public/amsfonts/cm/cmmi9.pfb><G:/software/ctex/M
iKTeX/fonts/type1/public/amsfonts/cm/cmmib10.pfb><G:/software/ctex/MiKTeX/fonts
/type1/public/amsfonts/cm/cmr10.pfb><G:/software/ctex/MiKTeX/fonts/type1/public
/amsfonts/cm/cmr6.pfb><G:/software/ctex/MiKTeX/fonts/type1/public/amsfonts/cm/c
mr7.pfb><G:/software/ctex/MiKTeX/fonts/type1/public/amsfonts/cm/cmr9.pfb><G:/so
ftware/ctex/MiKTeX/fonts/type1/public/amsfonts/cm/cmsy10.pfb><G:/software/ctex/
MiKTeX/fonts/type1/public/amsfonts/cm/cmsy7.pfb><G:/software/ctex/MiKTeX/fonts/
type1/public/amsfonts/cm/cmsy9.pfb><G:/software/ctex/MiKTeX/fonts/type1/public/
amsfonts/cm/cmti10.pfb><G:/software/ctex/MiKTeX/fonts/type1/public/amsfonts/cm/
cmtt9.pfb><G:/software/ctex/MiKTeX/fonts/type1/public/amsfonts/symbols/msbm10.p
fb>
Output written on 3318-supp.pdf (11 pages, 619499 bytes).
PDF statistics:
 156 PDF objects out of 1000 (max. 8388607)
 0 named destinations out of 1000 (max. 500000)
 11 words of extra memory for PDF output out of 10000 (max. 10000000)
