# Supplementary material
Source: ML conference proceedings conference paper supplement (https://www.ecva.net/papers/eccv_2020/papers_ECCV/html/123640664_ECCV_2020_paper.php)
Supplement: Supplementary file 4 [file 123640664-supp.zip › 3318-supp/3318-supp.tex.bak]

% updated April 2002 by Antje Endemann
% Based on CVPR 07 and LNCS, with modifications by DAF, AZ and elle, 2008 and AA, 2010, and CC, 2011; TT, 2014; AAS, 2016; AAS, 2020

\documentclass[runningheads]{llncs}
\usepackage{graphicx}
\usepackage{epstopdf}
\usepackage{comment}
\usepackage{amsmath,amssymb} % define this before the line numbering.
\usepackage{color}
\usepackage[lined,boxed,ruled, commentsnumbered]{algorithm2e}
\usepackage{subfigure}
\usepackage{wrapfig}
\usepackage{enumitem}
\usepackage{multirow}
\usepackage{xr}

\newcommand{\st}{\text{s.t. }}
\newcommand{\supp}{\text{supp}}
\input{math_commands.tex}
\externaldocument{../3318/3318}

% INITIAL SUBMISSION - The following two lines are NOT commented
% CAMERA READY - Comment OUT the following two lines
%\usepackage{ruler}
%\usepackage[width=122mm,left=12mm,paperwidth=146mm,height=193mm,top=12mm,paperheight=217mm]{geometry}

\begin{document}
% \renewcommand\thelinenumber{\color[rgb]{0.2,0.5,0.8}\normalfont\sffamily\scriptsize\arabic{linenumber}\color[rgb]{0,0,0}}
% \renewcommand\makeLineNumber {\hss\thelinenumber\ \hspace{6mm} \rlap{\hskip\textwidth\ \hspace{6.5mm}\thelinenumber}}
% \linenumbers
\pagestyle{headings}
\mainmatter
\def\ECCVSubNumber{3318}  % Insert your submission number here

\title{Meta-Learning with Network Pruning \\(Supplementary Materials)} % Replace with your title

% INITIAL SUBMISSION
\begin{comment}
\titlerunning{ECCV-20 submission ID \ECCVSubNumber}
\authorrunning{ECCV-20 submission ID \ECCVSubNumber}
\author{Anonymous ECCV submission}
\institute{Paper ID \ECCVSubNumber}
\end{comment}
%******************

% CAMERA READY SUBMISSION
%\begin{comment}
\titlerunning{Meta-Learning with Network Pruning}
% If the paper title is too long for the running head, you can set
% an abbreviated paper title here
%
\author{Hongduan Tian\inst{1} \and
Bo Liu\inst{2} \and
Xiao-Tong Yuan\inst{1} \and
Qingshan Liu\inst{1}}

\authorrunning{Tian et al.}
% First names are abbreviated in the running head.
% If there are more than two authors, 'et al.' is used.
\institute{B-DAT Lab, Nanjing University of Information Science and Technology, Nanjing, 210044, China \and
  JD Finance America Corporation, Mountain View, CA 94043, USA\\
\email{\{hongduan.tian,kfliubo,xtyuan1980\}@gmail.com},
%\email{kfliubo@gmail.com},
%\email{xtyuan1980@gmail.com}\\
\email{qsliu@nuist.edu.cn}}
%\end{comment}
%******************
\maketitle

%\begin{abstract}

%\end{abstract}


%\clearpage\mbox{}Page \thepage\ of the manuscript.
%\clearpage\mbox{}Page \thepage\ of the manuscript.
\appendix
%\section{Related Work}\label{related_work}
%\label{gen_inst}

%\textbf{Optimization-based meta-learning.}\quad The family of optimization-based meta-learning approaches usually learns a good hypothesis which can fast adapt to unseen tasks~\cite{Ravi2016OptimizationAA,finn2017model,nichol2018first,khodak2019provable}. Compared to the metric~\cite{koch2015siamese,snell2017prototypical} and memory~\cite{weston2014memory,santoro2016meta} based meta learning algorithms, optimization based meta-learning algorithms are gaining increasing attention due to their simplicity, versatility and effectiveness. As a recent leading framework for optimization-based meta-learning, MAML~\cite{finn2017model} is designed to estimate a meta-initialization network which can be well fine-tuned in an unseen task via only one or few steps of minibatch gradient descent. Although simple in principle, MAML requires computing Hessian-vector product for back-propagation, which could be computationally expensive when the model is big. The first-order MAML (FOMAML) is therefore proposed to improve  the computational efficiency by simply ignoring the second-order derivatives in MAML. Reptile~\cite{nichol2018first} is another approximated first-order algorithm which works favorably since it maximizes the inner product between gradients from the same task yet different minibatches, leading to improved model generalization. In~\cite{lee2019meta}, the meta-learner is treated as a feature embedding module of which the output is used as input to train a multi-class kernel support vector machine as base learner. To deal with overfitting, the CAVIA method~\cite{zintgraf2019fast} decomposes the meta-parameters into the so called context parameters and shared parameters. The context parameters are updated for task adaption with limited capacity while the shared parameters are meta-trained for generalization across tasks.

%\textbf{Network pruning.}
%Early network weight pruning algorithms date back to Optimal Brain Damage~\cite{lecun1990optimal} and Optimal Brain Surgeon~\cite{hassibi1993optimal}. A dense-to-sparse algorithm was developed by~\cite{han2015learning} to first remove near-zero weights and then fine tune the preserved weights. As a serial work of dense-to-sparse, the dense-sparse-dense (DSD) method~\cite{han2016dsd} was proposed to re-initialize the pruned parameters as zero and retrain the entire network after the dense-to-sparse pruning phase. The iterative hard thresholding (IHT) method~\cite{jin2016training} shares a similar spirit with DSD to conduct multiple rounds of iteration between pruning and retraining. ~\cite{srinivas2015data} proposed a data-free method to prune the neurons in a trained network. In~\cite{louizos2017learning}, an $L_{0}$-norm regularized risk minimization framework was proposed to learn sparse networks during training. More recently, ~\cite{Frankle2018TheLT} introduced and studied the ``lottery ticket hypothesis" which assumes that once a network is initialized, there should exist an optimal subnetwork, which can be learned by pruning, that performs as well as the original net or even superior.

%Despite the remarkable success achieved by both meta-learning and network pruning, it still remains largely open to investigate the impact of network pruning on alleviating the meta-overfitting of optimization based meta-learning, which is of primal interest to our study in this paper.

\section{Proofs of Results}
\subsection{Proof of Theorem~\ref{thrm:universe_generalizaion}}\label{append:proof_thrm_1}
We need the following lemma which guarantees the uniform convergence of $\mathcal{R}_S(\theta)$ towards $\mathcal{R}(\theta)$ for all $\theta$ when the loss function is Lipschitz continuous and smooth, and the optimization is limited on a bounded domain.
\begin{lemma}\label{lemma:universe_support}
Assume that the domain of interest $\Theta \subseteq \mathbb{R}^p$ is bounded by $R$ and the loss function $\ell(f_\theta(\vx),y)$ is $G$-Lipschitz continuous and $H$-smooth with respect to $\theta$. Also assume that $0\le\ell(f_\theta(\vx),y) \le B$ for all $\{f_\theta(\vx), y\}$. Then for any $\delta\in(0,1)$, the following bound holds with probability at least $1-\delta$ over the random draw of sample set $S$ for all $\theta \in \Theta$,
\[
\left|\mathcal{R}(\theta) - \mathcal{R}_S(\theta)\right| \le  \mathcal{O}\left(B\sqrt{\frac{\log(1/\delta) + p\log(\sqrt{M}G R(1+\eta H)/B)}{M}}\right).
\]
\end{lemma}
\begin{proof}
For any task $T$, let us denote $\tilde\ell(\theta; T):=\gL_{\gD^{query}_{T}}\left(\theta - \eta \nabla_{\theta}\gL_{\gD^{supp}_{T}}(\theta)\right)$. Since $\ell(f_\theta(\vx),y)$ is $G$-Lipschitz continuous with respect to $\theta$, we can show that
\[
\begin{aligned}
|\tilde\ell(\theta;T) - \tilde\ell(\theta';T)| \le& G\|\theta - \eta \nabla_{\theta}\gL_{\gD^{supp}_{T}}(\theta) - \theta' + \eta \nabla_{\theta}\gL_{\gD^{supp}_{T}}(\theta')\| \\
\le& G\left(\|\theta - \theta'\| + \eta \|\nabla_{\theta}\gL_{\gD^{supp}_{T}}(\theta) - \nabla_{\theta}\gL_{\gD^{supp}_{T}}(\theta')\|\right) \\
\le& G(1+\eta H)\|\theta - \theta'\|,
\end{aligned}
\]
which indicates that $\tilde\ell(\theta;T)$ is $G(1+\eta H)$-Lipschitz continuous for any task $T$.

As a subset of an $L_2$-sphere, it is standard that the covering number of $\Theta$ with respect to the $L_2$-distance is upper bounded by
\[
\mathcal{N}(\epsilon, \Theta, L_2) \le \mathcal{O}\left(\left(1+\frac{R}{\epsilon}\right)^p\right).
\]
Since the task-level loss function $\tilde\ell(\theta;T)$ is $G(1+\eta H)$-Lipschitz continuous as shown above, it can be verified that the covering number of the class of functions $\mathcal{\tilde L}=\left\{T \mapsto \tilde\ell(\theta;T)\mid \theta \in \Theta\right\}$ with respect to $L_\infty$-distance $L_\infty(\tilde\ell(\theta_1;\cdot),\tilde\ell(\theta_2;\cdot)):=\sup_{T} |\tilde\ell(\theta_1;T) - \tilde\ell(\theta_2;T)|$ is given by
\[
\mathcal{N}(\epsilon, \mathcal{\tilde L}, L_\infty) \le \mathcal{N}\left(\frac{\epsilon}{G(1+\eta H)}, \Theta, L_2\right) \le \mathcal{O}\left(\left(1+\frac{GR(1+\eta H)}{\epsilon}\right)^p\right).
\]
Therefore, there exists a set of points $\Omega \subseteq \mathbb{R}^p$ with cardinality at most $\mathcal{N}(\epsilon, \mathcal{\tilde L}, L_\infty)$ such that the following bound holds for any $\theta\in \Theta$:
\[
\min_{\omega\in \Omega}|\tilde\ell(\theta;T)-\tilde\ell(\omega;T)| \le \epsilon, \ \forall T.
\]
For an arbitrary $\omega\in \Omega$, based on Hoeffding��s inequality (note that $\ell(\cdot,\cdot)\le B$ implies $\tilde \ell(\cdot,\cdot)\le B$) we have
\[
\mathbb{P}\left(|\mathcal{R}_S(\omega) - \mathcal{R}(\omega)|>t\right) \le \exp\left\{-\frac{Mt^2}{2B^2}\right\}.
\]
For any $\theta\in \Theta$, based on triangle inequality we can show that there exits $\omega_\theta\in \Omega$ such that
\[
\begin{aligned}
|\mathcal{R}_S(\theta) - \mathcal{R}(\theta)| =& |\mathcal{R}_S(\theta) - \mathcal{R}_S(\omega_\theta) + \mathcal{R}_S(\omega_\theta) - \mathcal{R}(\omega_\theta) + \mathcal{R}(\omega_\theta) - \mathcal{R}(\theta)| \\
\le& 2\epsilon + |\mathcal{R}_S(\omega_\theta) -\mathcal{R}(\omega_\theta)| \le 2\epsilon + \max_{\omega\in \Omega}|\mathcal{R}_S(\omega) - \mathcal{R}(\omega)|.
\end{aligned}
\]
Applying uniform bound we know that
\[
\begin{aligned}
&\mathbb{P}\left(\sup_{\theta\in \Theta}|\mathcal{R}(\theta)- \mathcal{R}_S(\theta)|\ge 2\epsilon + t \right) \\
\le& \mathcal{N}(\epsilon, \mathcal{L}, \ell_\infty)\exp\left(-\frac{M t^2}{2B^2}\right)\le \mathcal{O}\left(\left(1 + \frac{GR(1+\eta H)}{\epsilon}\right)^p\exp\left(-\frac{M t^2}{2B^2}\right)\right).
\end{aligned}
\]
Let us choose $\epsilon=B/\sqrt{M}$ and
\[
t = \sqrt{2}B\sqrt{\frac{\log(1/\delta) + p\log(GR(1+\eta H)/\epsilon)}{M}}
\]
such that the right hand side of the previous inequality equals $\delta$. Then we obtain that with probability at least $1-\delta$
\[
\begin{aligned}
\sup_{\theta \in \Theta}|\mathcal{R}(\theta) - \mathcal{R}_S(\theta)| \le \mathcal{O}\left(B\sqrt{\frac{\log(1/\delta) + p\log(\sqrt{M}GR(1+\eta H)/B)}{M}}\right).
\end{aligned}
\]
This proves the desired result.
\end{proof}
Based on this lemma, we can readily prove the main result in the theorem.
\begin{proof}[Proof of Theorem~\ref{thrm:universe_generalizaion}]
For any fixed supporting set $J \in \mathcal{J}$, by applying Lemma~\ref{lemma:universe_support} we obtain that the following uniform convergence bound holds for all $\theta$ with $\supp(\theta) \subseteq J$ with probability at least $1-\delta$ over $S$:
\[
\left|\mathcal{R}(\theta) - \mathcal{R}_S(\theta)\right| \le \mathcal{O}\left(B\sqrt{\frac{\log(1/\delta) + k\log(\sqrt{M}GR(1+\eta H)/B)}{M}}\right).
\]
Since by constraint the parameter vector $\theta$ is always $k$-sparse, we thus have $\supp(\theta) \in \mathcal{J}$. Then by union probability we get that with probability at least $1-\delta$, the following bound holds for all $\theta$ with $\|\theta\|_0\le k$:
\[
\left|\mathcal{R}(\theta)  - \mathcal{R}_S(\theta)\right| \le  \mathcal{O}\left(B\sqrt{\frac{\log(|\mathcal{J}|) + \log(1/\delta) + k\log(\sqrt{M}GR(1+\eta H)/B)}{M}}\right).
\]
It remains to bound the cardinality $|\mathcal{J}|$. From~\cite[Lemma 2.7]{rigollet201518} we know $|\mathcal{J}|=\binom{p}{k}\le \left(\frac{ep}{k}\right)^k$, which then implies the desired generalization gap bound. This completes the proof.
\end{proof}


\subsection{Proof of Corollary~\ref{corol:universe_generalizaion_multiclass}}

\begin{proof}
Let $\mathcal{R}_\gamma$ be a population version of $\mathcal{R}_{\gamma,S}$ with margin-based loss function $\ell_\gamma$ used for computing both $\gL_{\gD^{supp}_{T}}$ and $\gL_{\gD^{query}_{T}}$. Since $\ell_\gamma$ is a surrogate of the binary loss as used by $\mathcal{\tilde R}$ for query classification error evaluation, we must have $\mathcal{\tilde R}\le \mathcal{R}_\gamma$. Then the desired bound follows directly by invoking Theorem~\ref{thrm:universe_generalizaion} to the considered margin loss.
\end{proof}


\section{Detailed Experimental Settings}\label{Appdx:Detailed_Settings}
\subsection{Model}\label{appdx:model}

The model used in our experiments is consistent with that considered for Reptile\cite{nichol2018first}. The model used throughout the experiment contains 4 sequential modules. Each module has a convolutional layer with 3$\times$3 kernel, followed by a batch normalization and a ReLU activation. Additionally for the experiments on MiniImageNet, a $2\times2$ max-pooling pooling is used on the batch normalization layer output while for Omniglot a stride of 2 is used in convolution. The above network structure design is consistent with those considered for Reptile in~\cite{nichol2018first}. We test with varying channel number $\{32, 64, 128, 256\}$ in each convolution layer to show the robustness of our algorithms to meta-overfitting.

\subsection{Datasets}\label{subsec:dataset}
There are three popular benchmark datasets used in our experiments.

\begin{figure}
\begin{center}
\centering
%\vspace{-2em}
    \subfigure[5-way 1-shot tasks generated from Omniglot]{
        \begin{minipage}[t]{0.48\linewidth}\label{omniglot_tasks}
        %\vspace{-0.4cm}
        \includegraphics[width=0.31\textheight]{omniglot_data.pdf}
        \end{minipage}}
    \subfigure[5-way 1-shot tasks generated from MiniImageNet or TieredImageNet dataset]{
        \begin{minipage}[t]{0.48\linewidth}\label{imagenet_tasks}
        %\vspace{-0.4cm}
        \includegraphics[width=0.31\textheight]{miniimagenet_data.pdf}
        \end{minipage}}
\caption{Tasks used in our experiments. (a). Tasks generated from Omniglot. (b). Tasks generated from MiniImageNet or TieredImageNet dataset.}
\label{Fig:DSD_hyper}
%\vspace{-2em}
\end{center}
\end{figure}
\begin{table}[h]
%\vspace{-0.5em}
\caption{Detailed experimental settings for Omniglot, MiniImageNet, TieredImageNet datasets with DSD-based Reptile.}
\label{DSD_Detailed_experimental_settings}
\begin{center}
\begin{tabular}{|l|c|c|c|}
\hline
\bf Hyperparameters         &\bf Omniglot       &\bf MiniImageNet       &\bf TieredImageNet\\
\hline
classes                     &$5$                &$5$                    &$5$\\
shot                        &$1$ or $5$         &$1$ or $5$             &$1$ or $5$\\
inner batch                 &$10$               &$10$                   &$6$\\
inner iterations            &$5$                &$8$                    &$8$\\
outer learning rate         &$1$                &$1$                    &$1$\\
meta batch                  &$5$                &$5$                    &$5$\\
meta iterations             &$10^4$             &$10^4$                 &$10^4$\\
evaluation batch            &$5$                &$5$                    &$5$\\
evaluation iterations       &$50$               &$50$                   &$50$\\
inner learning rate         &$0.001$            &$0.001$                &$0.001$\\
pre-train iterations        &$3\times10^4$      &$3\times10^4$          &$3\times10^4$\\
pruning iterations(32c)          &$5\times10^4$      &$5\times10^4$     &$5\times10^4$\\
retrain iterations(32c)          &$2\times10^4$      &$2\times10^4$            &$2\times10^4$\\
pruning iterations(64/128/256c)  &$5\times10^4$      &$6\times10^4$     &$5\times10^4$\\
retrain iterations(64/128/256c)  &$2\times10^4$      &$10^4$            &$2\times10^4$\\
\hline
\end{tabular}
\end{center}
%\vspace{-3em}
\end{table}

\textbf{Omniglot}\quad The Omniglot dataset has 1623 characters from 50 alphabets. Each character contains 20 instances drawn by different individuals. The size of each image is 28$\times$28. We randomly select 1200 characters for meta training and the rest are used for meta testing. Following~\cite{santoro2016meta}, we also adopt a data augmentation strategy based on image rotation to enhance performance.

\textbf{MiniImageNet}\quad The MiniImageNet dataset consists of 100 classes from the ImageNet dataset~\cite{krizhevsky2012imagenet} and each class contains $600$ images of size $84\times84\times$3. There are $64$ classes used for training, $12$ classes for validation and $24$ classes for testing.

\textbf{TieredImageNet}\quad The TieredImageNet dataset consists of 608 classes from the ILSVRC-12 dataset \cite{russakovsky2015imagenet} and each image is scaled to $84\times84\times3$. There are 351 classes used for training, 97 classes for validation and 160 classes used for testing.

\subsection{Detailed Experimental Settings}\label{subsec:Hyper_settings}
%\subsubsection{Classification Experiments}\label{classification_exp_details}
The experimental details of DSD-based Reptile and IHT-based Reptile can respectively be seen in Table~\ref{DSD_Detailed_experimental_settings} and Table~\ref{IHT_Detailed_experimental_settings}. There are two points of hyperparameter settings that should be highlighted.

\begin{itemize}[leftmargin=*]
\item The outer learning rate has an initial value $1.0$ which will decay with iteration added.
\item For MiniImageNet~\cite{vinyals2016matching} with DSD-based Reptile, the iteration number of pruning phase for $32$-channel case is $5\times10^4$ and for $64/128/256$-channel case is $6\times10^4$. Correspondingly, the iteration number of retraining phase for $32$-channel case is $2\times10^4$ and for $64/128/256$-channel case is $10^4$.
\item For study of complex networks in Section~\ref{ssect:complex}, since our experiments are conducted on 4 RTX 2080Ti GPUs(11GB) while MetaOptNet is trained on 4 Titan X GPUs(12GB), we have to reduce the training shots from 15 to 10 in our experiments. For fair comparison, we rerun the baseline on the same model as in that paper with 10 training shots. We respectively set the number of iterations of pre-training, pruning and retraining as 5 epochs, 20 epochs and 15 epochs. The learning rate is 0.1 in the first 30 epochs, 0.006 in next 5 epochs and 0.0012 in the final 5 epochs.
\item For CAVIA, in DSD-based CAVIA case, the numbers of the iterations for pre-training, pruning and retraining phase are respectively 20K, 20K and 20K. In IHT-based CAVIA case, the iteration number of pre-training is 20K, and the iterative phase include 2 sparse-dense processes. Each sparse-dense process contains 20K iterations in which 16K iterations are for pruning fine-tuning and 4K iterations are for dense retraining.
\end{itemize}


\begin{table}[h]
%\vspace{-2em}
\caption{Detailed experimental settings for Omniglot, MiniImageNet, TieredImageNet datasets with IHT-based Reptile.}
\label{IHT_Detailed_experimental_settings}
\begin{center}
\begin{tabular}{|l|c|c|c|}
\hline
\bf Hyperparameters         &\bf Omniglot       &\bf MiniImageNet       &\bf TieredImageNet\\
\hline
classes                     &$5$                &$5$                    &$5$\\
shot                        &$1$ or $5$         &$1$ or $5$             &$1$ or $5$\\
inner batch                 &$10$               &$10$                   &$6$\\
inner iterations            &$5$                &$8$                    &$8$\\
outer learning rate         &$1$                &$1$                    &$1$\\
meta batch                  &$5$                &$5$                    &$5$\\
meta iterations             &$10^4$             &$10^4$                 &$10^4$\\
evaluation batch            &$5$                &$5$                    &$5$\\
evaluation iterations       &$50$               &$50$                   &$50$\\
inner learning rate         &$0.001$            &$0.001$                &$0.001$\\
epoch numbers               &$5$                &$5$                    &$5$\\
iteration numbers per interval          &$2\times10^4$      &$2\times10^4$     &$2\times10^4$\\
pruning iterations          &$1.5\times10^4$     &$1.5\times10^4$         &$1.5\times10^4$\\
retrain iterations          &$5\times10^3$      &$5\times10^3$          &$5\times10^3$\\
\hline
\end{tabular}
\end{center}
%\vspace{-2em}
\end{table}
%\subsection{Dataset}

\section{Additional Experimental Results}\label{apdx_c}

This appendix contains complete experimental results for Omniglot, MiniImageNet and TieredImageNet datasets. We performed our methods on 4-layer CNNs with varying channel number $\{32, 64, 128, 256\}$ as mentioned in Section \ref{Appdx:Detailed_Settings}.

\subsection{Results on Omniglot dataset}\label{Appdx:Omniglot_complete_results}
\begin{table}[h]
\caption{Few Shot Classification results on Omniglot dataset for 4-layer convolutional network with different channels on 5-way 1-shot and 5-way 5-shot tasks. The ``$\pm$'' shows $95\%$ confidence intervals over tasks. The evaluation  baselines are run by us.}
\label{Omniglot5wayresults_table}
\begin{center}
\begin{tabular}{|l|l|l|cc|}
\hline
\bf Methods     &\bf Backbone      &\bf Rate    &\bf 5-way 1-shot    &\bf 5-way 5-shot\\
\hline
\multirow{4}*{Reptile baseline}     &32-32-32-32            &0$\%$      &96.63$\pm$0.17$\%$     &99.31$\pm$0.07$\%$ \\
                                   ~&64-64-64-64            &0$\%$      &97.68$\pm$0.10$\%$     &99.48$\pm$0.06$\%$ \\
                                   ~&128-128-128-128        &0$\%$      &97.99$\pm$0.11$\%$     &99.60$\pm$0.13$\%$ \\
                                   ~&256-256-256-256        &0$\%$      &98.05$\pm$0.13$\%$     &99.65$\pm$0.06$\%$ \\ \hline

\multirow{16}*{DSD-based Reptile}   &\multirow{4}*{32-32-32-32}        &$10\%$      &96.42$\pm$0.17$\%$      &\bf99.38$\pm$0.07$\%$ \\
                                                                  ~&&$20\%$      &95.98$\pm$0.18$\%$      &99.33$\pm$0.07$\%$ \\
                                                                  ~&&$30\%$      &96.22$\pm$0.17$\%$      &99.23$\pm$0.08$\%$ \\
                                                                  ~&&$40\%$      &96.53$\pm$0.17$\%$      &99.37$\pm$0.07$\%$ \\ \cline{2-5}

                                   ~&\multirow{4}*{64-64-64-64}        &$10\%$      &\bf97.64$\pm$0.02$\%$   &\bf 99.50$\pm$0.05$\%$ \\
                                                                  ~&&$20\%$      &97.60$\pm$0.07$\%$      &99.49$\pm$0.04$\%$ \\
                                                                  ~&&$30\%$      &97.47$\pm$0.05$\%$      &99.49$\pm$0.05$\%$ \\
                                                                  ~&&$40\%$      &97.43$\pm$0.01$\%$      &99.45$\pm$0.03$\%$ \\ \cline{2-5}

                                   ~&\multirow{4}*{128-128-128-128}    &$10\%$      &\bf 98.04$\pm$0.10$\%$  &99.61$\pm$0.10$\%$ \\
                                                                  ~&&$20\%$      &97.99$\pm$0.10$\%$      &99.62$\pm$0.12$\%$ \\
                                                                  ~&&$30\%$      &97.96$\pm$0.12$\%$      &\bf 99.63$\pm$0.12$\%$ \\
                                                                  ~&&$40\%$      &97.99$\pm$0.10$\%$      &99.61$\pm$0.10$\%$ \\ \cline{2-5}

                                   ~&\multirow{4}*{256-256-256-256}        &$10\%$      &\bf98.12$\pm$0.12$\%$   &\bf99.68$\pm$0.05$\%$ \\
                                                                  ~&&$20\%$      &98.02$\pm$0.13$\%$      &99.66$\pm$0.05$\%$ \\
                                                                  ~&&$30\%$      &97.96$\pm$0.13$\%$      &99.67$\pm$0.05$\%$ \\
                                                                  ~&&$40\%$      &97.99$\pm$0.10$\%$      &99.63$\pm$0.06$\%$ \\ \hline
\multirow{16}*{IHT-based Reptile}      &\multirow{4}*{32-32-32-32}        &$10\%$      &\bf96.65$\pm$0.16$\%$   &99.49$\pm$0.06$\%$ \\
                                                                  ~&&$20\%$      &96.54$\pm$0.17$\%$      &\bf99.57$\pm$0.06$\%$ \\
                                                                  ~&&$30\%$      &96.45$\pm$0.17$\%$      &99.52$\pm$0.06$\%$ \\
                                                                  ~&&$40\%$      &96.21$\pm$0.18$\%$      &99.48$\pm$0.07$\%$ \\ \cline{2-5}

                               ~&\multirow{4}*{64-64-64-64}        &$10\%$      &97.63$\pm$0.14$\%$      &99.49$\pm$0.06$\%$ \\
                                                                  ~&&$20\%$      &97.60$\pm$0.13$\%$      &\bf99.57$\pm$0.06$\%$ \\
                                                                  ~&&$30\%$      &\bf97.77$\pm$0.15$\%$   &99.52$\pm$0.06$\%$ \\
                                                                  ~&&$40\%$      &97.51$\pm$0.1$\%$       &99.48$\pm$0.07$\%$ \\ \cline{2-5}

                               ~&\multirow{4}*{128-128-128-128}        &$10\%$      &98.12$\pm$0.12$\%$      &99.63$\pm$0.06$\%$ \\
                                                                  ~&&$20\%$      &\bf98.22$\pm$0.12$\%$   &99.64$\pm$0.05$\%$ \\
                                                                  ~&&$30\%$      &98.01$\pm$0.13$\%$      &\bf 99.65$\pm$0.05$\%$ \\
                                                                  ~&&$40\%$      &98.06$\pm$0.12$\%$      &99.63$\pm$0.06$\%$ \\ \cline{2-5}

                               ~&\multirow{4}*{256-256-256-256}        &$10\%$      &\bf98.16$\pm$0.12$\%$   &99.66$\pm$0.05$\%$ \\
                                                                  ~&&$20\%$      &98.08$\pm$0.13$\%$      &\bf99.69$\pm$0.05$\%$ \\
                                                                  ~&&$30\%$      &98.05$\pm$0.13$\%$      &99.64$\pm$0.05$\%$ \\
                                                                  ~&&$40\%$      &97.90$\pm$0.13$\%$      &99.65$\pm$0.05$\%$ \\
\hline
\end{tabular}
\end{center}
\end{table}
 The baselines and all the results of Omniglot dataset are reported in Table \ref{Omniglot5wayresults_table}. For each case, both DSD-based Reptile approach and IHT-based Reptile approach are evaluated on various pruning rates. The settings are the same as proposed in Section \ref{subsec:Hyper_settings}.

For 32-channel case and 64-channel cases, which is less prone to be overfitting, both DSD-based Reptile approach and IHT-based Reptile approach tend to achieve comparable performance to baselines. %On 5-way 1-shot task settings, it can be observed that the accuracy doesn't drop too much and can achieve similar performance as baselines. The accuracy of the worst result is the case of 32-channel CNNs with 20$\%$ pruning rate which drops about 0.65$\%$, and the best one is the case of 64-channel CNNs with 30$\%$ pruning rate that improves about 0.1$\%$. On 5-way 5-shot task settings, most cases outperform the baseline. As shown in the table, even in 32-channel case, when the pruning rate is 20$\%$, the performance of IHT-based Reptile imporves about 0.26$\%$. For 128-channel and 256-channel cases, our method consistently achieves better performance than the baselines. The most important is that with channels added, the baselines keep increasing, but our method can still improve the performance, which can manifest the impressive advantage of our method.
When the channel size increases to $128$ and $256$, slightly improved performance can be observed. This is consistent with our analysis that overfiting is more likely to happen when channel number is relatively large and weight pruning helps alleviate such phenomenon to improve the generalization performance, which then leads to accuracy improvement with retraining operation.

\subsection{Results on MiniImageNet dataset}\label{Appdx:MiniImageNet_complete_results}

In this section, we report the detailed results of experiments on MiniImageNet dataset.
\begin{table}[h]
\caption{Few Shot Classification results on MiniImageNet dataset for 4-layer convolutional network with different channels on 5 way setting. The ``$\pm$'' shows $95\%$ confidence intervals over tasks. The evaluation  baselines are run by us.}
\label{MiniImageNet5wayresults_table}
\begin{center}
\begin{tabular}{|l|l|l|cc|}
\hline
\bf Methods     &\bf Backbone       &\bf Rate    &\bf 5-way 1-shot    &\bf 5-way 5-shot
\\ \hline
\multirow{4}*{Reptile baseline}     &32-32-32-32        &0$\%$      &50.30$\pm$0.40$\%$     &64.27$\pm$0.44$\%$ \\
                                   ~&64-64-64-64        &0$\%$      &51.08$\pm$0.44$\%$     &65.46$\pm$0.43$\%$ \\
                                   ~&128-128-128-128    &0$\%$      &49.96$\pm$0.45$\%$     &64.40$\pm$0.43$\%$ \\
                                   ~&256-256-256-256    &0$\%$      &48.60$\pm$0.44$\%$     &63.24$\pm$0.43$\%$ \\
\multirow{4}*{CAVIA baseline}       &32-32-32-32        &0$\%$      &47.24$\pm$0.65$\%$     &59.05$\pm$0.54$\%$ \\
                                   ~&128-128-128-128    &0$\%$      &49.84$\pm$0.68$\%$     &64.63$\pm$0.54$\%$ \\
                                   ~&512-512-512-512    &0$\%$      &51.82$\pm$0.65$\%$     &65.85$\pm$0.55$\%$ \\
MetaOptNet-SVM                      &ResNet-12          &0$\%$      &61.95$\pm$0.60$\%$     &77.79$\pm$0.45$\%$ \\ \hline

\multirow{13}*{DSD-based Reptile}         &\multirow{4}*{32-32-32-32}     &$10\%$     &\bf50.65$\pm$0.45$\%$  &\bf65.29$\pm$0.44$\%$ \\
                                                                        ~&&$20\%$     &49.94$\pm$0.43$\%$     &64.65$\pm$0.43$\%$ \\
                                                                        ~&&$30\%$     &50.18$\pm$0.43$\%$     &\bf65.78$\pm$0.41$\%$ \\
                                                                        ~&&$40\%$     &\bf50.83$\pm$0.45$\%$  &\bf65.24$\pm$0.44$\%$ \\ \cline{2-5}

                                   ~&\multirow{4}*{64-64-64-64}           &$10\%$     &51.12$\pm$0.45$\%$     &65.80$\pm$0.44$\%$ \\
                                                                        ~&&$20\%$     &\bf51.91$\pm$0.45$\%$  &\bf67.21$\pm$0.43$\%$ \\
                                                                        ~&&$30\%$     &\bf51.91$\pm$0.45$\%$  &\bf67.23$\pm$0.43$\%$ \\
                                                                        ~&&$40\%$     &\bf51.96$\pm$0.45$\%$  &\bf67.17$\pm$0.43$\%$ \\ \cline{2-5}

                                   ~&\multirow{4}*{128-128-128-128}       &$30\%$     &51.98$\pm$0.45$\%$     &68.16$\pm$0.43$\%$ \\
                                                                        ~&&$40\%$     &52.15$\pm$0.45$\%$     &68.19$\pm$0.43$\%$ \\
                                                                        ~&&$50\%$     &52.08$\pm$0.45$\%$     &\bf68.87$\pm$0.42$\%$ \\
                                                                        ~&&$60\%$     &\bf52.27$\pm$0.45$\%$  &68.44$\pm$0.42$\%$ \\ \cline{2-5}
                                   ~&256-256-256-256                      &$60\%$     &\bf53.00$\pm$0.45$\%$  &\bf68.04$\pm$0.42$\%$ \\ \hline

\multirow{13}*{IHT-based Reptile}         &\multirow{4}*{32-32-32-32}     &$10\%$     &\bf50.45$\pm$0.45$\%$  &63.91$\pm$0.46$\%$ \\
                                                                        ~&&$20\%$     &50.26$\pm$0.47$\%$     &63.63$\pm$0.45$\%$ \\
                                                                        ~&&$30\%$     &50.21$\pm$0.44$\%$     &\bf65.05$\pm$0.45$\%$ \\
                                                                        ~&&$40\%$     &49.74$\pm$0.46$\%$     &64.15$\pm$0.45$\%$ \\ \cline{2-5}

                                   ~&\multirow{4}*{64-64-64-64}           &$10\%$     &\bf52.23$\pm$0.45$\%$  &\bf66.08$\pm$0.43$\%$ \\
                                                                        ~&&$20\%$     &\bf52.13$\pm$0.46$\%$  &\bf66.78$\pm$0.43$\%$ \\
                                                                        ~&&$30\%$     &51.98$\pm$0.45$\%$     &66.14$\pm$0.43$\%$ \\
                                                                        ~&&$40\%$     &\bf52.59$\pm$0.45$\%$  &\bf67.41$\pm$0.43$\%$ \\ \cline{2-5}

                                   ~&\multirow{4}*{128-128-128-128}       &$30\%$     &51.64$\pm$0.45$\%$     &67.05$\pm$0.43$\%$ \\
                                                                        ~&&$40\%$     &52.73$\pm$0.45$\%$     &\bf68.69$\pm$0.42$\%$ \\
                                                                        ~&&$50\%$     &52.76$\pm$0.45$\%$     &67.63$\pm$0.43$\%$ \\
                                                                        ~&&$60\%$     &\bf52.95$\pm$0.45$\%$  &68.04$\pm$0.42$\%$ \\ \cline{2-5}


                                   ~&256-256-256-256                      &$60\%$     &\bf49.85$\pm$0.44$\%$  &\bf66.56$\pm$0.42$\%$ \\ \hline
DSD+MetaOptNet-SVM                  &ResNet-12                            &$20\%$     &\bf{62.16$\pm$0.62$\%$}&77.51$\pm$0.48$\%$ \\ \hline
\end{tabular}
\end{center}
\end{table}

From the table, it can be obviously observed that our method achieves remarkable performance consistently. For one thing, with the number of channels increasing, the accuracies of our methods keep being improved while the baselines perform oppositely.
For example, in the 32-channel setting in which the model is less prone to overfit, when applying DSD-based Reptile with $10\%$ and $40\%$ pruning rate, the accuracy gain is $0.35\%$ and $0.5\%$ on 5-way 1-shot tasks and $1.02\%$ and $1\%$ on 5-way 5-shot tasks.
In the 64-channel setting, DSD-based Reptile respectively achieves $0.83\%$, $0.83\%$, $0.88\%$ improvements over 5-way 1-shot baseline and $1.75\%$, $1.77\%$, $1.18\%$ improvements over 5-way 5-shot baseline with pruning rates $20\%$, $30\%$, $40\%$. Meanwhile our IHT-based Reptile approach respectively improves about $1.15\%$, $1.05\%$, $1.51\%$ on 5-way 1-shot tasks and $0.62\%$, $1.32\%$ and $1.95\%$ on 5-way 5-shot tasks with pruning rates $10\%$, $20\%$, $40\%$.
In the setting of 128-channel, all the cases of our method outperform the baseline remarkably, and the best accuracy of DSD-based Reptile on 5-way 1-shot tasks is nearly $3\%$ higher than the baseline while on 5-way 5-shot tasks the gain is about $4.47\%$.

Our method also outperforms CAVIA~\cite{zintgraf2019fast}, which can increase the network size without overfitting. With our method, CNNs with 64 channels can obtain better performance than the best result of CAVIA. %To evaluate our method on more complex networks, we also perform the experiments on MetaOptNet~\cite{lee2019meta}. We can observe that our DSD variant algorithm achieves $0.2\%$ improvement on 5-way 1-shot tasks and similar performance on 5-way 5-shot tasks. However, there is a trade-off between accuracy and training time because in our experiments the total training epoch number is 40 while it is 21 in ~\cite{lee2019meta}.%These results demonstrate that by embedding network pruning approaches into meta-learning, the pruning phase can help to avoid learning the useless and thus ease the overfitting, and the retraining phase which preserves the capacity of the model assist to improve the performance of the generalization.

\subsection{Results on TieredImageNet dataset}\label{Appdx:TieredImageNet_complete_results}
\begin{table}[h]
\caption{Few Shot Classification results on TieredImageNet dataset for 4-layer convolutional network with different channels on 5 way setting. The ``$\pm$'' shows $95\%$ confidence intervals over tasks. The evaluation  baselines are run by us.}
\label{TieredImageNet5wayresults_table}
\begin{center}
\begin{tabular}{|l|l|l|cc|}
\hline
\bf Methods     &\bf Backbone       &\bf Rate    &\bf 5-way 1-shot    &\bf 5-way 5-shot
\\ \hline
\multirow{4}*{Reptile baseline}     &32-32-32-32        &0$\%$      &50.52$\pm$0.45$\%$     &64.63$\pm$0.44$\%$ \\
                                   ~&64-64-64-64        &0$\%$      &51.98$\pm$0.45$\%$     &67.70$\pm$0.43$\%$ \\
                                   ~&128-128-128-128    &0$\%$      &53.30$\pm$0.45$\%$     &69.29$\pm$0.42$\%$ \\
                                   ~&256-256-256-256    &0$\%$      &54.62$\pm$0.45$\%$     &68.06$\pm$0.42$\%$ \\ \hline

\multirow{8}*{DSD-based Reptile}          &\multirow{2}*{32-32-32-32}     &$10\%$     &\bf 50.94$\pm$0.46$\%$     &64.65$\pm$0.44$\%$ \\
                                                                  ~&&$20\%$     &49.85$\pm$0.46$\%$         &63.72$\pm$0.44$\%$ \\ \cline{2-5}
                                   ~&\multirow{2}*{64-64-64-64}     &$10\%$      &\bf 52.62$\pm$0.46$\%$     &66.69$\pm$0.43$\%$ \\
                                                                  ~&&$20\%$     &51.95$\pm$0.45$\%$         &66.05$\pm$0.43$\%$ \\ \cline{2-5}
                                   ~&\multirow{2}*{128-128-128-128} &$10\%$     &53.39$\pm$0.46$\%$         &67.22$\pm$0.43$\%$ \\
                                                                  ~&&$20\%$     &52.61$\pm$0.46$\%$         &66.39$\pm$0.43$\%$ \\ \cline{2-5}
                                   ~&\multirow{2}*{256-256-256-256} &$10\%$     &54.55$\pm$0.45$\%$         &\bf68.60$\pm$0.43$\%$ \\
                                                                  ~&&$20\%$     &\bf 54.98$\pm$0.45$\%$     &67.98$\pm$0.43$\%$ \\ \hline

\multirow{8}*{IHT-based Reptile}         ~&\multirow{2}*{32-32-32-32}     &$10\%$     &\bf 50.58$\pm$0.46$\%$     &63.09$\pm$0.45$\%$ \\
                                                                  ~&&$20\%$     &50.19$\pm$0.46$\%$         &63.42$\pm$0.44$\%$ \\ \cline{2-5}
                                   ~&\multirow{2}*{64-64-64-64}     &$10\%$     &51.75$\pm$0.45$\%$         &65.20$\pm$0.44$\%$ \\
                                                                  ~&&$20\%$     &\bf53.22$\pm$0.46$\%$      &66.15$\pm$0.44$\%$ \\ \cline{2-5}
                                   ~&\multirow{2}*{128-128-128-128} &$10\%$     &\bf 53.48$\pm$0.45$\%$     &69.36$\pm$0.42$\%$ \\
                                                                  ~&&$20\%$     &52.98$\pm$0.45$\%$         &66.22$\pm$0.43$\%$ \\ \cline{2-5}
                                   ~&\multirow{2}*{256-256-256-256} &$10\%$     &\bf 55.06$\pm$0.45$\%$     &67.60$\pm$0.43$\%$ \\
                                                                  ~&&$20\%$     &54.38$\pm$0.45$\%$         &\bf69.36$\pm$0.42$\%$ \\
\hline
\end{tabular}
\end{center}
\end{table}

In this section, we present the detailed results of experiments on TieredImageNet dataset in Table~\ref{TieredImageNet5wayresults_table}.

From the table, we can observe that our method achieves good performance on 5-way 1-shot classification tasks. For example, in 32-channel settings, the accuracy of DSD-based Reptile with $10\%$ pruning rate is $\sim 0.5\%$ higher than baseline; in 64-channel settings, both DSD-based Reptile and IHT-based Reptile improve the performance evidently, respectively are $0.64\%$ and $1.24\%$; and in 256-channel settings, the best performance achieves $0.44\%$ improvement over the baseline.

However, in most 5-way 5-shot classification tasks, the performance of our method drops. We conjecture that the reason is TieredImageNet dataset, compared with MiniImageNet dataset, contains more classes.
%Although our method achieves success on 5-way 1-shot tasks, it doesn't perform well on 5-way 5-shot tasks. We conjecture that the reasons that our method fails are that for one thing, compared with 5-way 1-shot tasks, 5-way 5-shot tasks contain more data and are less possible to overfit the data; for another thing, TieredImageNet dataset includes more classes and an specific image class tends to not repeatedly appear in tasks, which also reduce the possibility of overfitting.

\clearpage

\bibliographystyle{splncs04}
\bibliography{mybib}
\end{document}
