# Supplementary material
Source: ML conference proceedings conference paper supplement (https://www.ecva.net/papers/eccv_2020/papers_ECCV/html/123640664_ECCV_2020_paper.php)

# Task 1

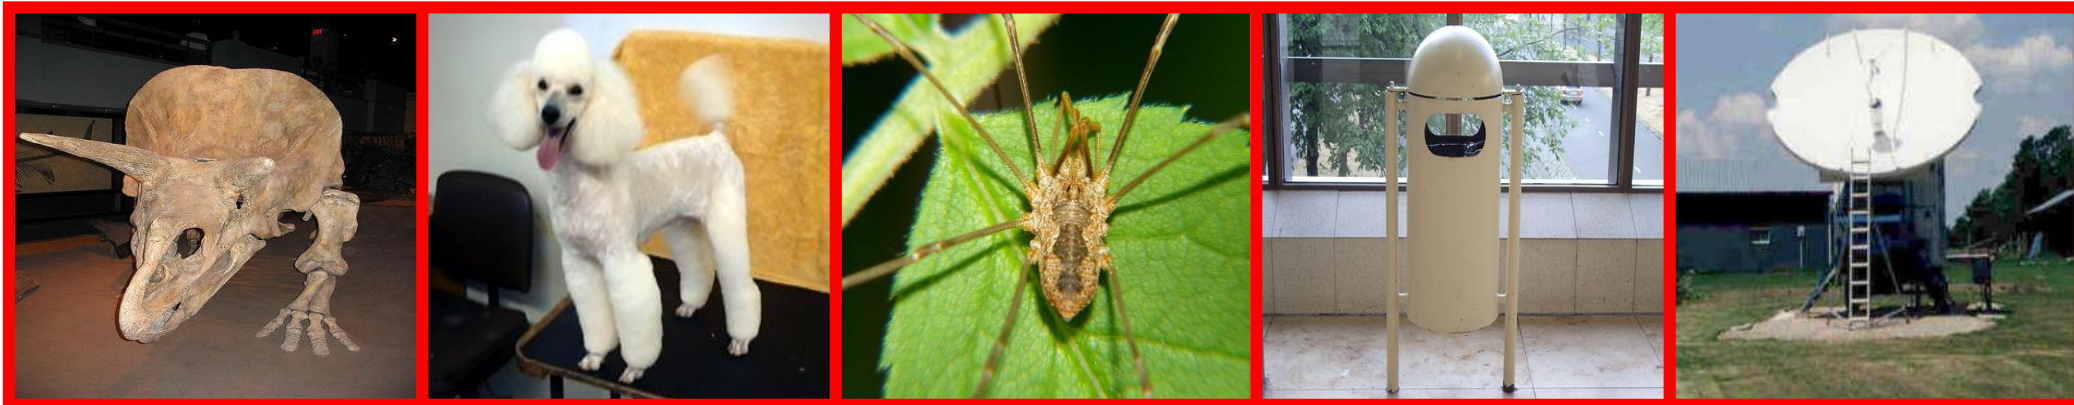

# Task 2

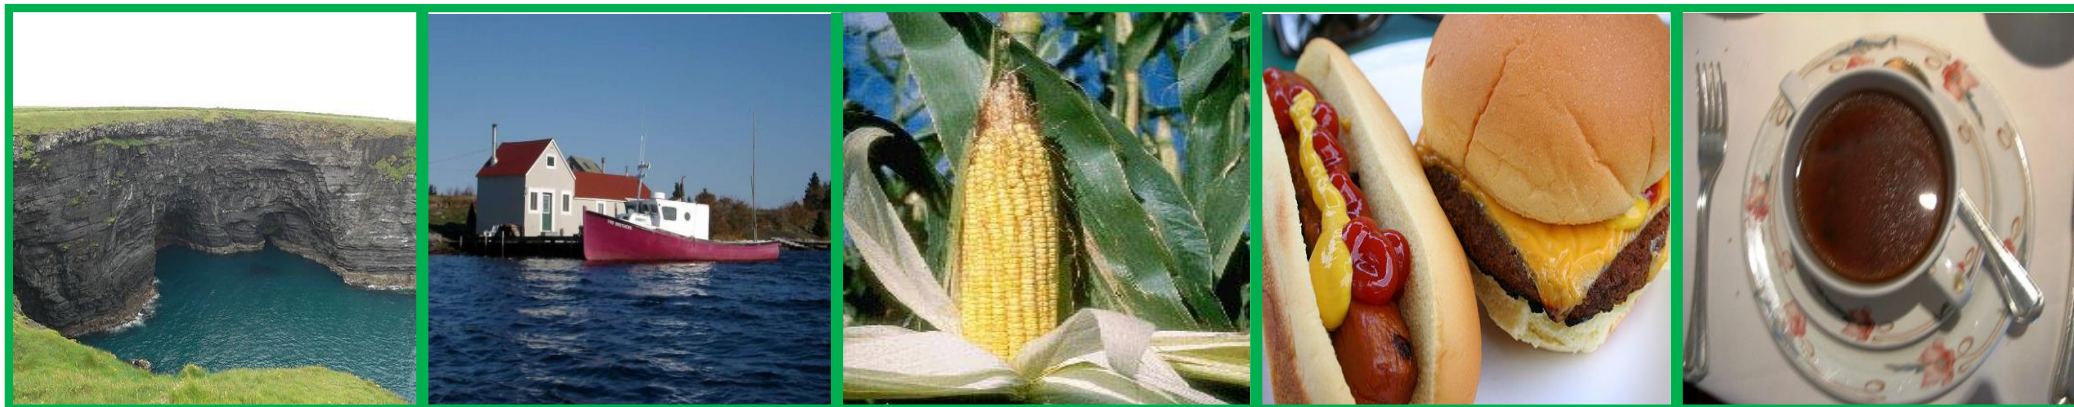

# Task 3

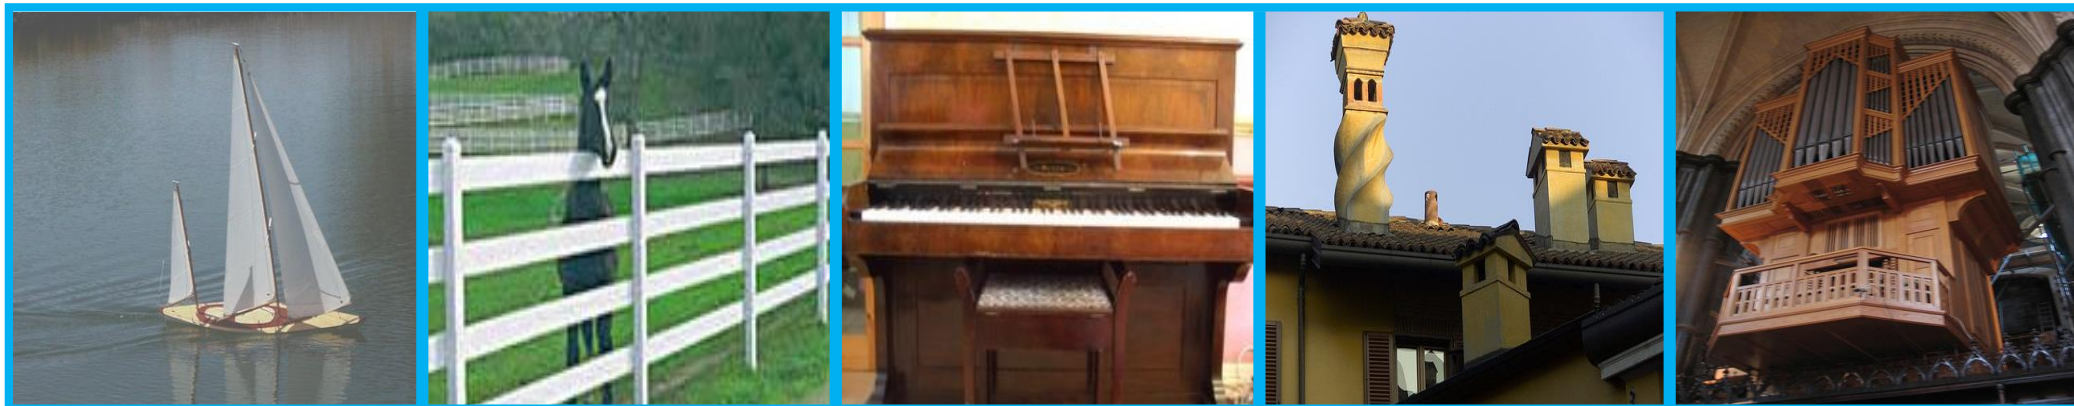

Supplement: Supplementary file 1 [file 123640664-supp.zip]

Task 1

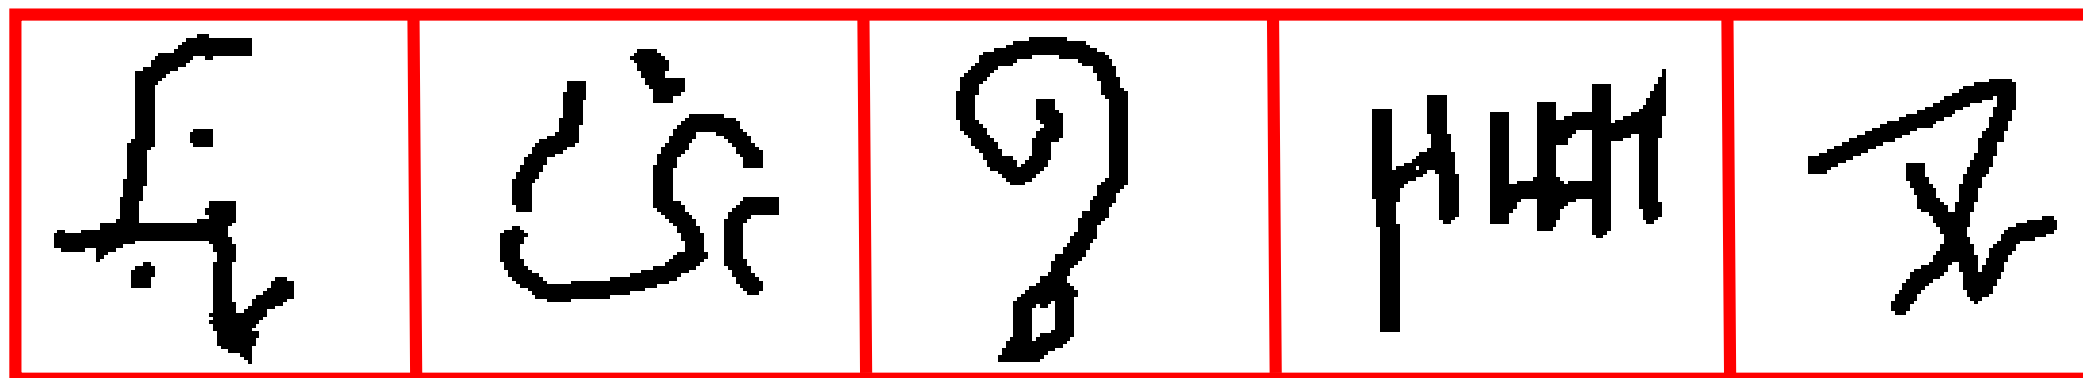

Task 2

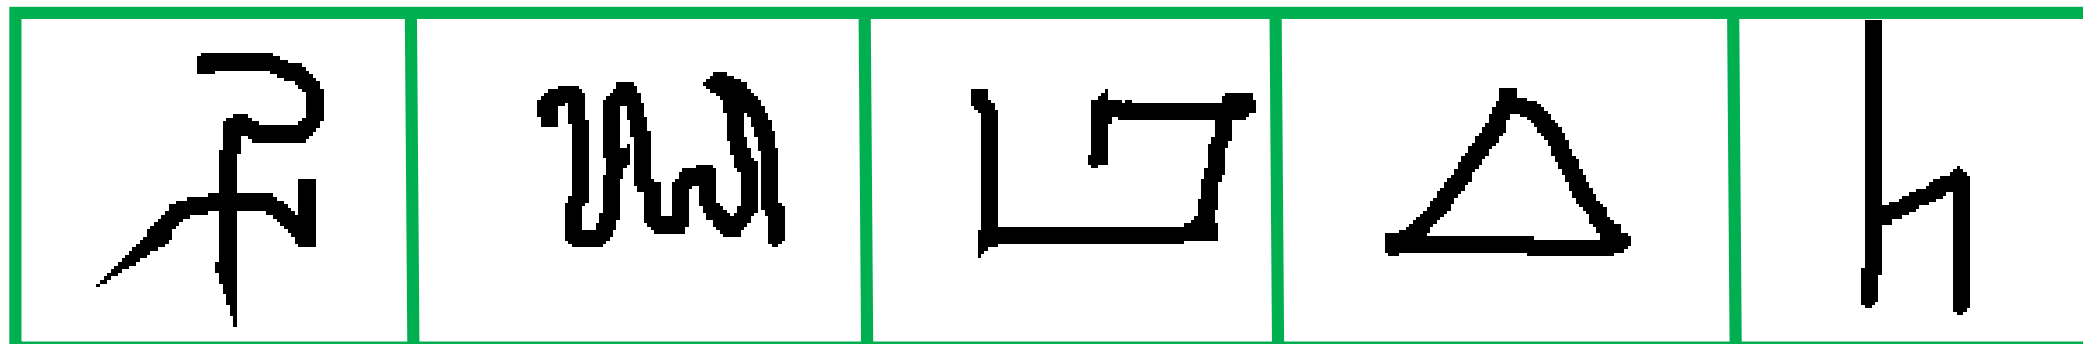

Task 3

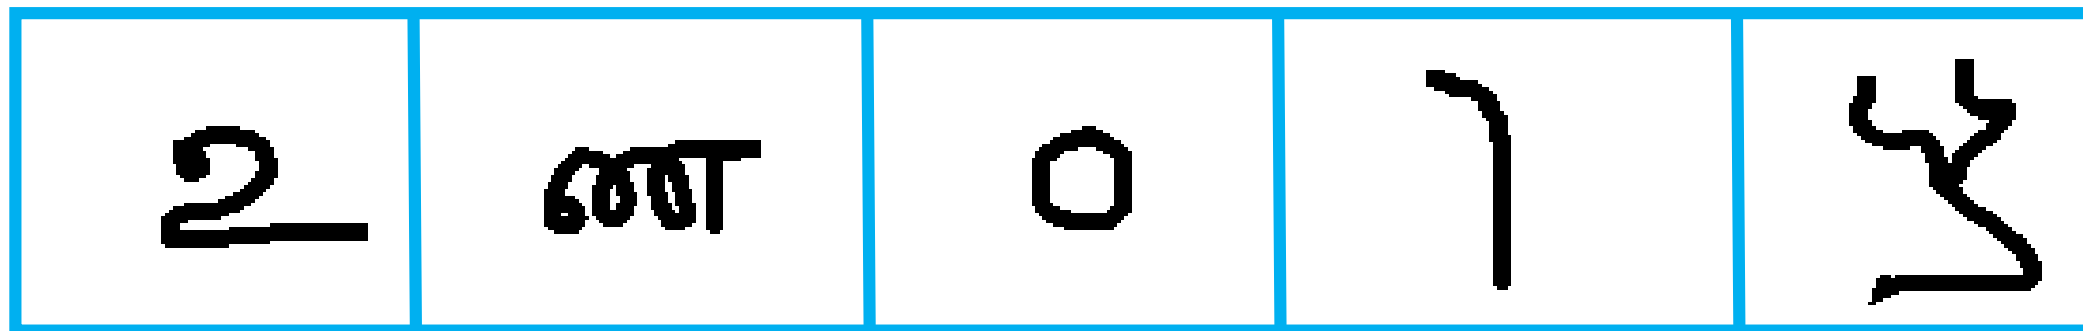

Supplement: Supplementary file 2 [file 123640664-supp.zip]
